# Supplementary material for: Different Assembly Patterns of Planktonic and Sedimentary Bacterial Community in a Few Connected Eutrophic Lakes
Source: MDPI journal article supplement (doi:10.3390/w14050723), 2022-02-24
Supplement: s1 [file s1]

Article

# Different Assembly Patterns of Planktonic and Sedimentary Bacterial Community in a Few Connected Eutrophic Lakes

Ming Xia, Fei Xiong, Xuemei Li, Dunhai Li, Zhicong Wang, Dongdong Zhai, Hongyan Liu, Yuanyuan Chen, Jixin Yu and Ying Wang

## Supplementary Materials

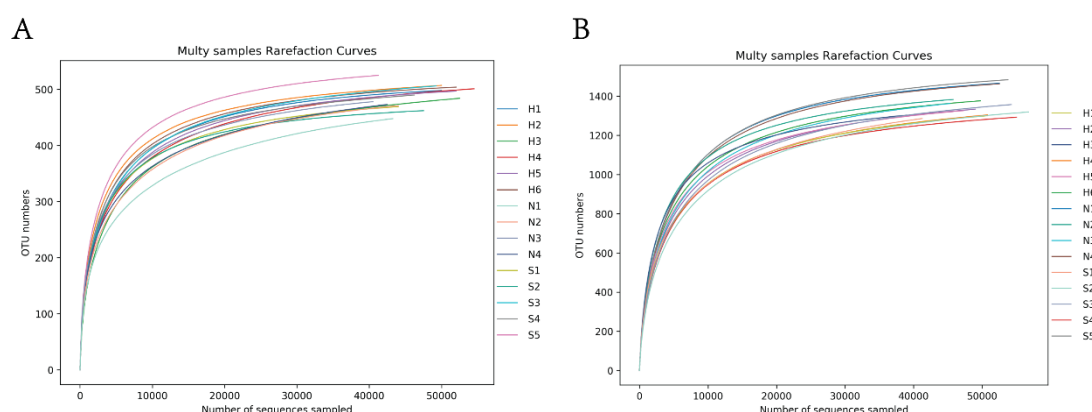

**Figure S1.** Rarefaction curve of planktonic (A) and sedimentary (B) samples.

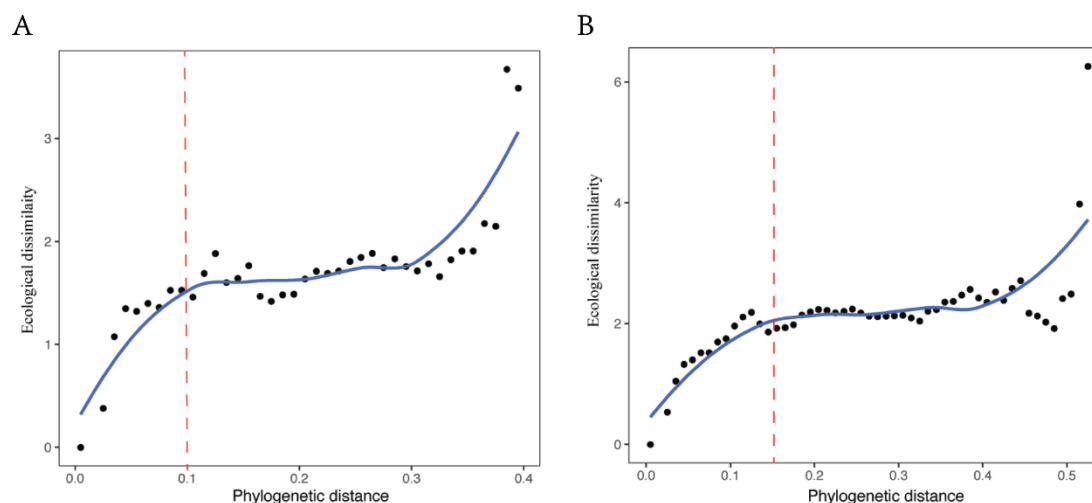

**Figure S2.** Phylogenetic signal in waters (A) and in sediments (B). Median habitat differences between pairs of OTUs as a function of between OTU phylogenetic distances. Medians are taken within phylogenetic distance bins. The vertical dotted line indicates the point at which the curve becomes non-monotonic, meaning the phylogenetic signal.

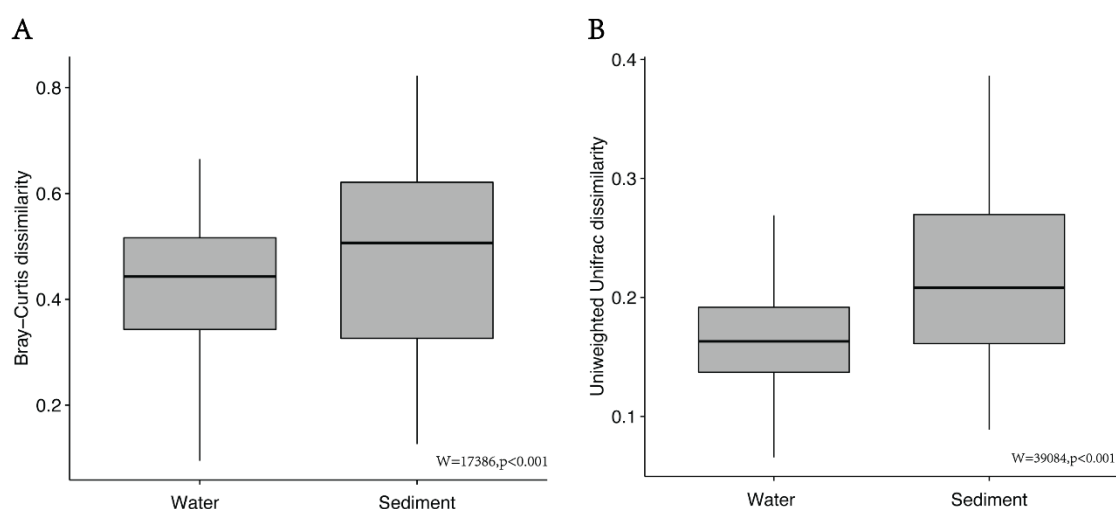

**Figure S3.** Comparison of Bray-Curtis dissimilarity (A) and Unweighted UniFrac dissimilarity (B) between planktonic and sedimentary bacterial. Water represents the planktonic bacteria and the Sediment represents the sedimentary bacteria. The bottom, middle, and top line of each box represents the first quartile, the median, and the third quartiles of the value range. The whiskers extend to values at 1.5X the inter-quartile range.

**Table S1.** Limnological parameters.

| Lake (Lake Code)     | Sample Code | Longitude (°E) | Latitude (°N) | Water Depth (m) |
|----------------------|-------------|----------------|---------------|-----------------|
| Lake Houguan<br>HGH  | H1          | 114.06308      | 30.28487      | 2.31            |
|                      | H2          | 114.07176      | 30.29178      | 2.46            |
|                      | H3          | 114.06478      | 30.29592      | 2.13            |
|                      | H4          | 114.07169      | 30.30328      | 2.61            |
|                      | H5          | 114.07229      | 30.3054       | 2.64            |
|                      | H6          | 114.07591      | 30.30438      | 2.01            |
| Lake Longyang<br>LYH | L1          | 114.10539      | 30.33133      | 1.89            |
|                      | L2          | 114.10214      | 30.33194      | 2.13            |
|                      | L3          | 114.10331      | 30.33305      | 2.52            |
|                      | L4          | 114.10236      | 30.33487      | 1.65            |
| Lake Moshui<br>MSH   | M1          | 114.14046      | 30.3216       | 1.38            |
|                      | M2          | 114.13386      | 30.32272      | 1.02            |
|                      | M3          | 114.1312       | 30.32385      | 1.68            |
|                      | M4          | 114.12363      | 30.32318      | 1.71            |
|                      | N1          | 114.10359      | 30.30236      | 1.59            |
| Lake Nantaizi<br>NTZ | N2          | 114.11079      | 30.29589      | 1.65            |
|                      | N3          | 114.11391      | 30.29356      | 1.47            |
|                      | N4          | 114.11383      | 30.29177      | 1.44            |
|                      | S1          | 114.09367      | 30.30566      | 1.11            |
| Lake Sanjiao<br>SJH  | S2          | 114.10001      | 30.3107       | 1.65            |
|                      | S3          | 114.10008      | 30.31218      | 1.65            |
|                      | S4          | 114.10068      | 30.31366      | 1.65            |
|                      | S5          | 114.09335      | 30.31325      | 1.47            |

**Table S2.** Physicochemical properties of the water and sediment collected from the sampled lakes.

| Samples | SD<br>(m) | T<br>(°C) | pH   | OPR | Cond. | DO<br>(mg/L) | TN<br>(mg/L) | NH4-N<br>(mg/L) | NO3-N<br>(mg/L) | TP<br>(mg/L) | PO <sub>4</sub> <sup>3-</sup><br>(mg/L) | chl.a<br>(µg/L) | COD <sub>cr</sub> | Mean<br>TSI <sub>c</sub> |
|---------|-----------|-----------|------|-----|-------|--------------|--------------|-----------------|-----------------|--------------|-----------------------------------------|-----------------|-------------------|--------------------------|
| H1      | 0.38      | 30        | 8.83 | 239 | 0.3   | 8.23         | 3.45         | 0.52            | 0.15            | 0.129        | 0.017                                   | 58.06           | 30.53             | 72.9                     |
| H2      | 0.3       | 30        | 8.87 | 238 | 0.3   | 9.69         | 0.71         | 0.5             | 0.3             | 0.21         | 0.017                                   | 148.18          | 26.72             | 79.5                     |
| H3      | 0.43      | 31        | 8.92 | 236 | 0.3   | 9.64         | 0.61         | 0.45            | 0.08            | 0.129        | 0.017                                   | 39.9            | 26.72             | 71.2                     |
| H4      | 0.43      | 31        | 9.08 | 231 | 0.3   | 10.68        | 0.91         | 0.5             | 0.48            | 0.129        | 0.035                                   | 51.75           | 26.72             | 72.0                     |
| H5      | 0.38      | 31        | 8.9  | 242 | 0.3   | 8.87         | 0.66         | 0.47            | 0.61            | 0.129        | 0.017                                   | 43.28           | 30.53             | 72.1                     |
| H6      | 0.31      | 31        | 8.88 | 221 | 0.3   | 8.41         | 4.41         | 0.45            | 0.15            | 0.162        | 0.07                                    | 57.09           | 19.08             | 75.0                     |
| L1      | 0.21      | 30.8      | 8.58 | 254 | 0.6   | 10.46        | 12.51        | 2.36            | 0.94            | 0.34         | 0.122                                   | 204.37          | 38.17             | 84.6                     |
| L2      | 0.27      | 31.1      | 8.34 | 264 | 0.5   | 9.35         | 5.73         | 4.62            | 0.91            | 0.34         | 0.052                                   | 194.89          | 30.53             | 83.3                     |
| L3      | 0.19      | 31        | 8.2  | 269 | 0.5   | 8.47         | 7.09         | 1.04            | 0.66            | 0.243        | 0.052                                   | 157.74          | 53.44             | 82.6                     |
| L4      | 0.26      | 31.5      | 8.44 | 259 | 0.5   | 11.49        | 7.85         | 1.02            | 1.06            | 0.259        | 0.07                                    | 187.35          | 3.82              | 81.9                     |
| M1      | 0.2       | 30.6      | 8.15 | 258 | 0.4   | 5.17         | 10.39        | 2.06            | 0.63            | 0.291        | 0.052                                   | 201.73          | 7.63              | 84.0                     |
| M2      | 0.17      | 30.9      | 8.56 | 249 | 0.4   | 8.95         | 8.16         | 2.21            | 0.43            | 0.323        | 0.052                                   | 229.92          | 11.45             | 85.7                     |
| M3      | 0.18      | 30.9      | 8.61 | 249 | 0.4   | 10.21        | 6.49         | 1.99            | 1.09            | 0.404        | 0.035                                   | 235.84          | 49.62             | 86.6                     |
| M4      | 0.22      | 31.6      | 8.34 | 261 | 0.4   | 8.5          | 5.07         | 1.84            | 0.66            | 0.34         | 0.052                                   | 220.95          | 68.7              | 84.6                     |
| N1      | 0.19      | 32.9      | 9.39 | 212 | 0.3   | 15.8         | 5.27         | 0.5             | 0.58            | 0.291        | 0.087                                   | 251.09          | 57.25             | 84.9                     |
| N2      | 0.18      | 32.6      | 9.13 | 229 | 0.3   | 11.9         | 2.33         | 0.52            | 0.3             | 0.226        | 0.07                                    | 87.02           | 34.35             | 80.7                     |
| N3      | 0.19      | 32.3      | 9    | 234 | 0.3   | 10.61        | 4.21         | 0.5             | 0.4             | 0.21         | 0.052                                   | 69.3            | 38.17             | 79.5                     |
| N4      | 0.2       | 31.2      | 8.88 | 240 | 0.4   | 10.2         | 7.6          | 0.5             | 0.46            | 0.21         | 0.052                                   | 79.78           | 83.97             | 79.6                     |
| S1      | 0.18      | 29.9      | 8.15 | 283 | 0.3   | 5.22         | 4.46         | 0.17            | 0.4             | 0.275        | 0.035                                   | 99.38           | 41.98             | 82.1                     |
| S2      | 0.21      | 29.8      | 8.48 | 266 | 0.3   | 5.94         | 2.03         | 0.5             | 0.43            | 0.259        | 0.087                                   | 89.44           | 3.82              | 80.7                     |
| S3      | 0.19      | 30.5      | 8.71 | 263 | 0.3   | 8.34         | 2.94         | 0.2             | 0.23            | 0.275        | 0.122                                   | 101.42          | 38.17             | 81.9                     |
| S4      | 0.18      | 31.2      | 9.09 | 239 | 0.3   | 10.22        | 3.5          | 0.27            | 0.35            | 0.372        | 0.052                                   | 96.1            | 61.07             | 83.6                     |
| S5      | 0.22      | 32.4      | 9.11 | 234 | 0.3   | 12.24        | 4.36         | 0.47            | 0.3             | 0.243        | 0.052                                   | 68.46           | 30.53             | 79.4                     |
